# Supplementary material for: Circuit-based intervention corrects excessive dentate gyrus output in the fragile X mouse model
Source: eLife journal article supplement (doi:10.7554/elife.92563), 2023-11-02

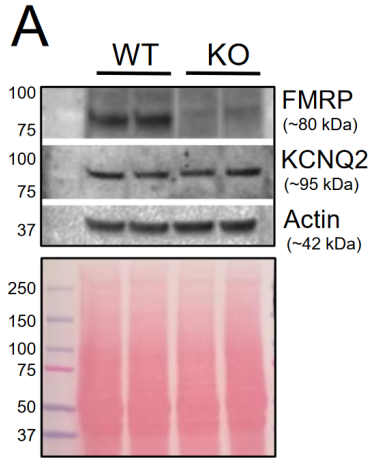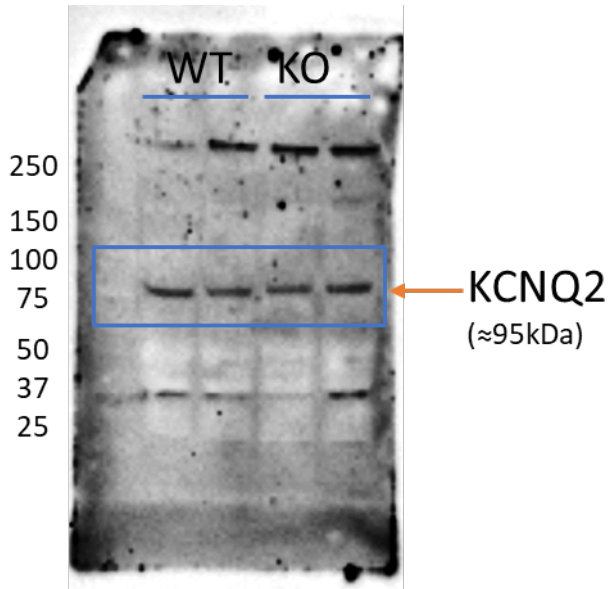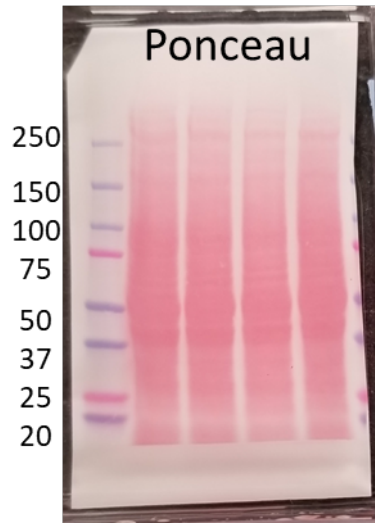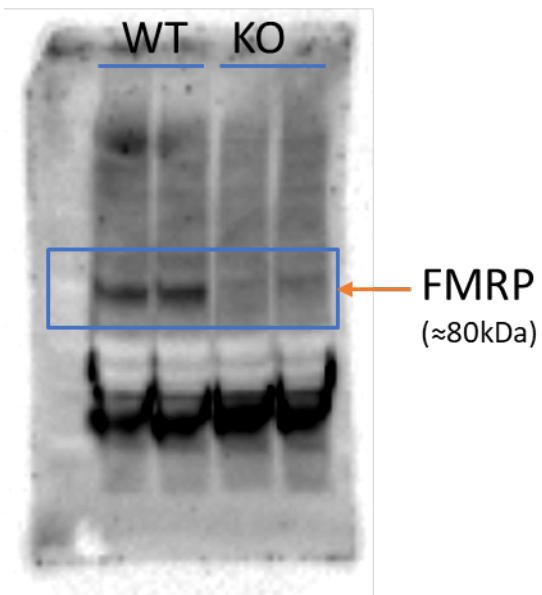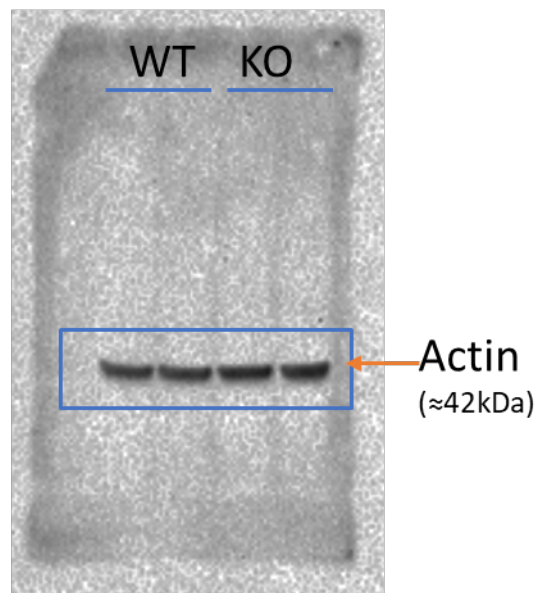

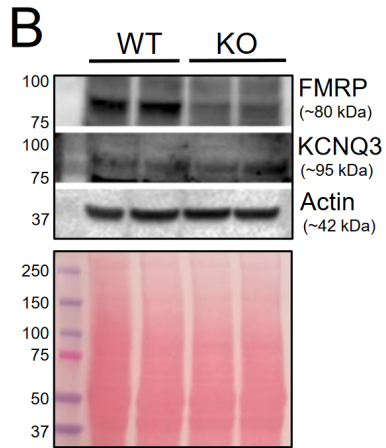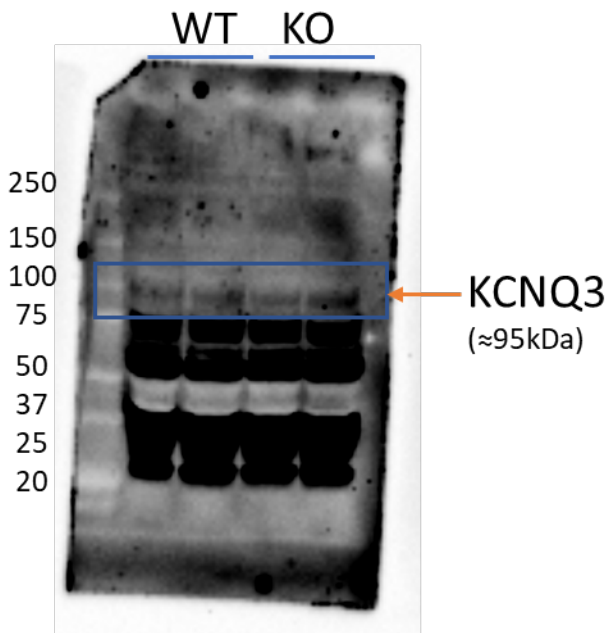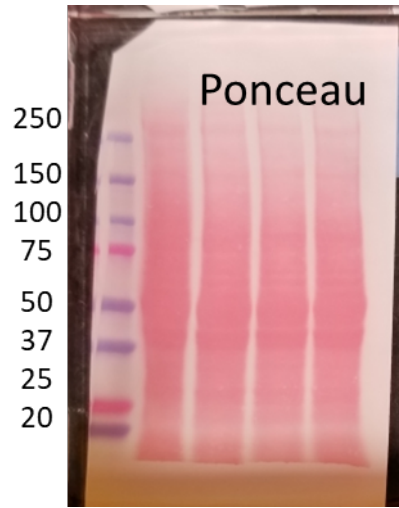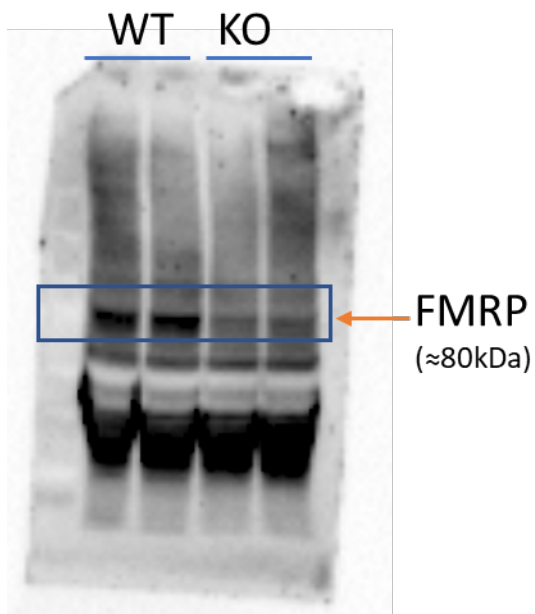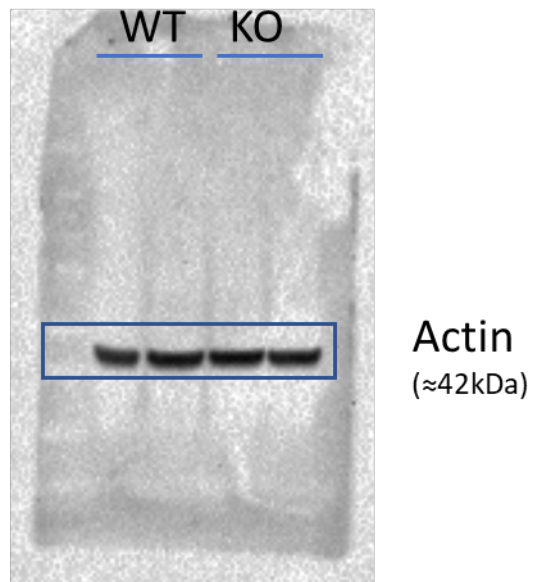

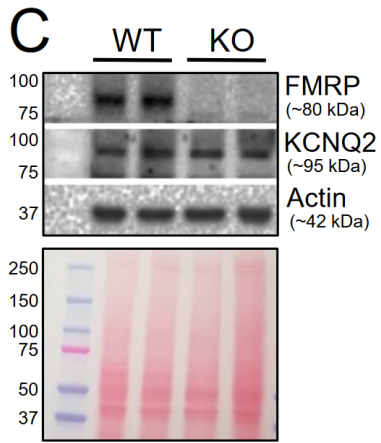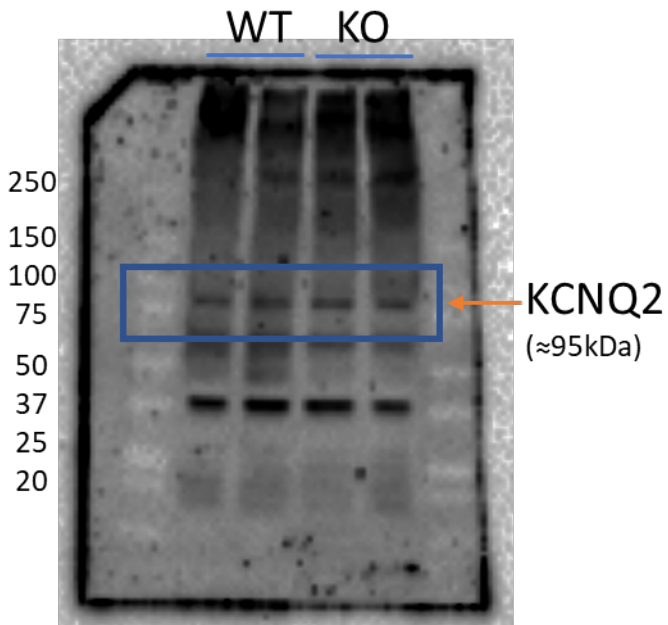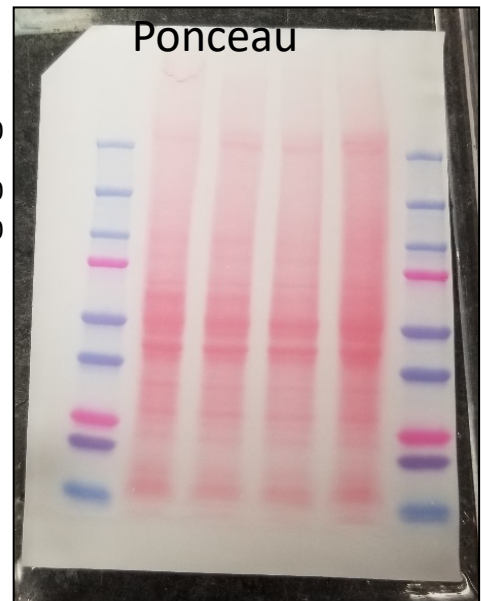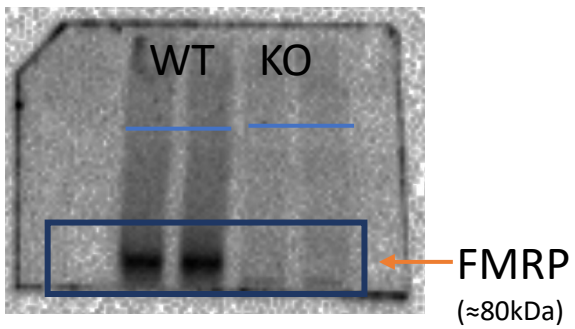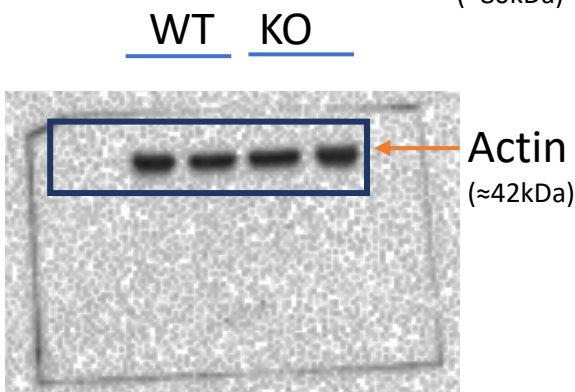

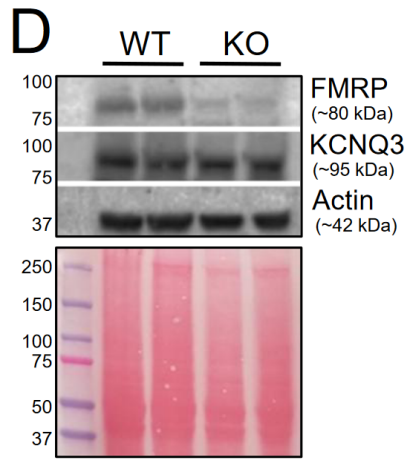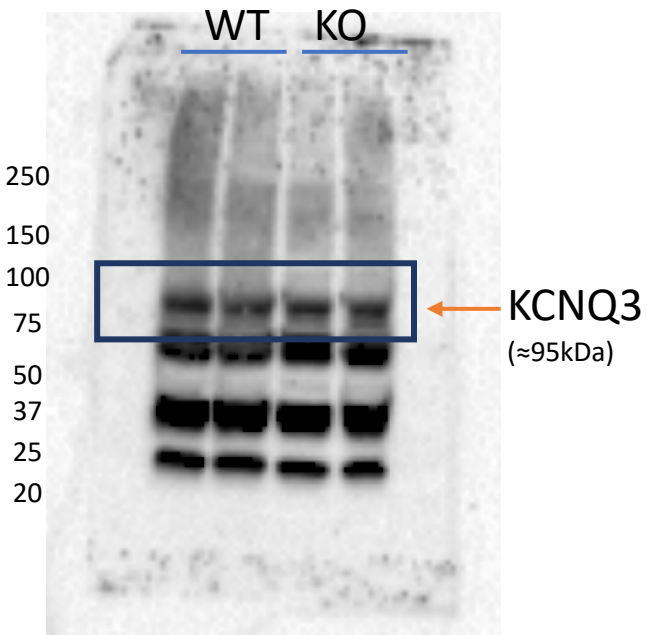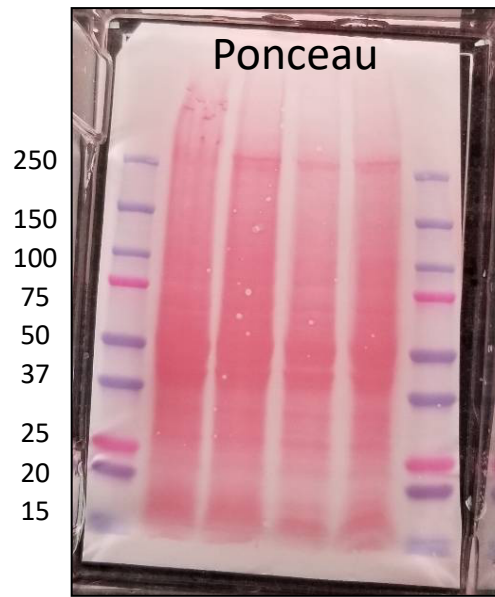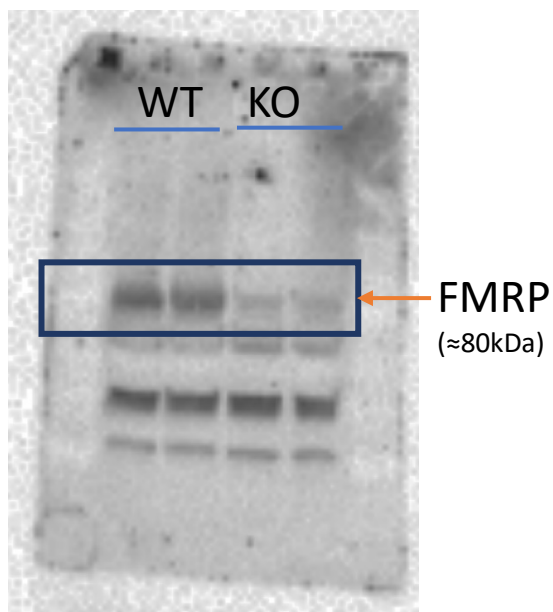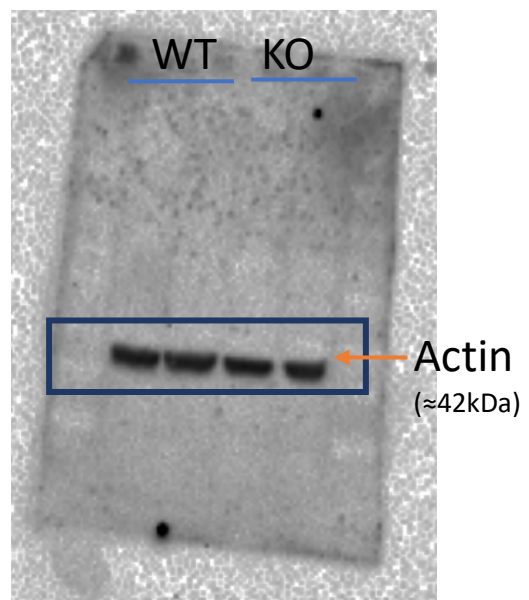

Supplement: fig3-figsupp1-data2 [file elife-92563-fig3-figsupp1-data2-v1.pdf]
