# Supplementary material for: Circuit-based intervention corrects excessive dentate gyrus output in the fragile X mouse model
Source: eLife. 2024 Feb 12;12:RP92563. doi: 10.7554/eLife.92563 (PMC10942577; doi:10.7554/eLife.92563)
Supplement: Supplementary file 1. [file elife-92563-supp1.xlsx]

## Sheet: Sheet1
Supplementary file 1—Supplementary Table 1. Statistical data for figures
Figure 1. Decreased excitability of dentate mossy cells in Fmr1 KO mice
Figure 1	Condition	Genotype	mean ± SEM	Number of cells tested	p value (WT vs KO)	p < 0.05 in red
Figure 1C AP count (/20 s)	-64 mV	WT	0.75 ± 0.25	8	0.16886
		KO	0.29 ± 0.18	7
	-63 mV	WT	1.00 ± 0.38	8	0.5962
		KO	0.71 ± 0.36	7
	-62 mV	WT	1.38 ± 0.50	8	0.35773
		KO	0.71 ± 0.47	7
	-61 mV	WT	3.00 ± 0.65	8	0.01015
		KO	0.57 ± 0.43	7
	-60 mV	WT	4.00 ± 1.21	8	0.04443
		KO	0.86 ± 0.59	7
	-59 mV	WT	8.63 ± 2.12	8	0.00783
		KO	1.29 ± 0.57	7
	-58 mV	WT	12.38 ± 2.59	8	0.00331
		KO	2.00 ± 0.85	7
	-57 mV	WT	17.88 ± 2.21	8	0.00018
		KO	3.71 ± 1.48	7
	-56 mV	WT	23.88 ± 3.48	8	0.0275
		KO	9.14 ± 4.95	7
	-55 mV	WT	30.75 ± 4.71	8	0.0447
		KO	14.71 ± 5.53	7
Figure 1	Parameter	Genotype	mean ± SEM	Number of cells tested	p value (WT vs KO)
Figure 1E AP	Count (/2-s ramp)	WT	16.80 ± 2.66	18	0.0197
		KO	9.97 ± 1.02	19
Figure 1F AP	Threshold (mV)	WT	-45.06 ± 0.78	18	0.00318
		KO	-42.14 ± 0.51	19
Figure 1G AP	Rheobase (pA)	WT	152.58 ± 11.66	18	0.0002
		KO	211.42 ± 7.82	19
Figure 1H AP	Rheo-charge (pC)	WT	81.77 ± 12.00	18	0.0002
		KO	150.44 ± 10.92	19
Figure 1I AP	Max. rise rate (mV/ms)	WT	300.73 ± 11.12	16	0.26123
		KO	283.67 ± 9.16	13
Figure 1J AP	Rise time (ms)	WT	0.267 ± 0.007	16	0.7801
		KO	0.269 ± 0.005	13
Figure 1K AP	Fall time (ms)	WT	0.677 ± 0.023	16	0.76199
		KO	0.687 ± 0.018	13
Figure 1L AP	Duration (ms)	WT	0.714 ± 0.022	16	0.56462
		KO	0.73 ± 0.013	13
Figure 1M AP	Peak potential (mV)	WT	34.63 ± 1.98	16	0.90338
		KO	34.94 ± 1.39	13
Figure 1N AP	Ampliutde (mV)	WT	79.88 ± 1.24	16	0.09566
		KO	76.72 ± 1.34	13
Figure 2. Decreased input resistance around threshold potential in Fmr1 KO mossy cells
Figure 2	Parameter	Genotype	mean ± SEM	Number of cells tested	p value (WT vs KO)	p value Before XE vs during XE within genotype
Figure 2A	RMP (mV)	WT	-63.38 ± 1.15	13	0.34397	N/A
		KO	-65.09 ± 1.35	13
Figure 2B	Capacitance (pF)	WT	132.00 ± 12.00	11	0.73345	N/A
		KO	137.73 ± 11.16	11
Figure 2C @ RMP	Input resistance (MW)	WT	167.13 ± 19.49	8	0.91027	N/A
		KO	164.23 ± 15.13	9
Figure 2D @ -45 mV (No XE)	Input resistance (MW)	WT	90.23 ± 4.67	7	0.03261	N/A
		KO	75.93 ± 3.82	8
Figure 2E @ -45 mV +XE991	Input resistance (MW)	WT	96.67 ± 4.83	7	0.39087	WT (No XE vs + XE)	0.00034
		KO	91.18 ± 3.96	8		KO (No XE vs + XE)	0.00068
Figure 2F	Input resistance change (MW)	WT	6.44 ± 0.88	7	0.01062	N/A
		KO	15.25 ± 2.64	8
Figure 3. Enhanced Kv7 function causes hypo-excitability in Fmr1 KO mossy cells
Figure 3	Parameter	Genotype	mean ± SEM	Number of cells tested	p value (WT vs KO)
Figure 3A	D holding current (pA)	WT	-20.13 ± 4.57	7	0.04644
		KO	-39.44 ± 7.79	4
Figure 3B	D membrane potential (mV)	WT	0.38 ± 0.32	7	0.00011
		KO	2.24 ± 0.20	10
Figure 3D	Kv7 current (pA/pF)	WT	0.16 ± 0.04	6	0.02328
		KO	0.32 ± 0.04	5
Figure 3	Condition	Genotype	mean ± SEM	Number of cells tested	p value (WT vs KO)
Figure 3E AP Threshold (mV)	Isolated MCs	WT	-43.73 ± 0.47	7	0.00616
		KO	-41.50 ± 0.49	8
	Isolated MCs + XE991	WT	-43.91 ± 0.31	7	0.51203
		KO	-43.48 ± 0.53	8
Figure 3F AP Rheobase (pA)	Isolated MCs	WT	157.98 ± 9.18	7	0.00937
		KO	204.79 ± 11.89	8
	Isolated MCs + XE991	WT	151.22 ± 7.31	7	0.32481
		KO	164.45 ± 10.24	8
Figure 3G Rheobase charge transfer (pC)	Isolated MCs	WT	86.81 ± 6.42	7	0.00646
		KO	143.18 ± 15.22	8
	Isolated MCs + XE991	WT	76.14 ± 6.62	7	0.22376
		KO	92.77 ± 10.68	8
Figure 3H AP count (/2-s ramp)	Isolated MCs	WT	30.80 ± 4.87	7	0.01664
		KO	16.48 ± 2.41	8
	Isolated MCs + XE991	WT	35.76 ± 4.08	7	0.11902
		KO	26.68 ± 3.63	8
Figure 4. Increased E/I ratio of inputs onto Fmr1 KO mossy cells
Figure 4	Parameter	Genotype	mean ± SEM	Number of cells tested	p value (WT vs KO)
Figure 4B Mossy cells	Cumulative probability*	WT	N/A	7	0.00072558
		KO	N/A	8
	sEPSC count (/min)	WT	795.86 ± 158.25	7	0.01058
		KO	1504.13 ± 173.43	8
Figure 4D Mossy cells	Cumulative probability*	WT	N/A	18	0.0344
		KO	N/A	22
	sIPSC count (/min)	WT	527.33 ± 59.52	18	0.00207
		KO	839.91 ± 70.22	22
Figure 4E Mossy cells	sEPSC amplitude (pA)	WT	73.58 ± 9.33	7	0.27954
		KO	90.11 ± 10.71	9
Figure 4F Mossy cells	sIPSC amplitude (pA)	WT	45.74 ± 3.05	18	0.55236
		KO	42.94 ± 3.40	22
Figure 4G Mossy cells	sEPSC Mean frequency (Hz)	WT	13.26 ± 2.64	7	0.01058
		KO	25.07 ± 2.89	8
Figure 4H Mossy cells	sIPSC Mean frequency (Hz)	WT	8.79 ± 0.99	18	0.00207
		KO	14.00 ± 1.17	22
Figure 4I Mossy cells	E/I ratio	WT	1.50921	Estimated by mean values
		KO	1.79 (↑18.66%)
*, K-S test was used for comparison of cumulative probability. ↑ in KO E/I ratio indicating the percentage of the KO value increases or decreases relative to respective WT value.
Figure 5. Decreased E/I ratio of inputs onto Fmr1 KO interneurons
Figure 5	Parameter	Genotype	mean ± SEM	Number of cells tested	p value (WT vs KO)
Figure 5B Interneurons	Cumulative probability*	WT	N/A	8	<0.00001
		KO	N/A	9
	sEPSC count (/min)	WT	675.88 ± 128.88	8	0.00048
		KO	119.00 ± 31.00	9
Figure 5D Interneurons	Cumulative probability*	WT	N/A	11	<0.00001
		KO	N/A	6
	sIPSC count (/min)	WT	145.36 ± 21.83	11	0.01753
		KO	61.33 ± 13.3	6
Figure 5E Interneurons	sEPSC amplitude (pA)	WT	52.50 ± 4.68	8	0.38597
		KO	43.75 ± 8.22	9
Figure 5F Interneurons	sIPSC amplitude (pA)	WT	42.36 ± 5.24	11	0.25395
		KO	33.11 ± 4.18	6
Figure 5G Interneurons	sEPSC Mean frequency (Hz)	WT	11.26 ± 2.15	8	0.00048
		KO	1.98 ± 0.52	9
Figure 5H Interneurons	sIPSC Mean frequency (Hz)	WT	2.42 ± 0.36	11	0.01753
		KO	1.02 ± 0.22	6
Figure 5I Interneurons	E/I ratio	WT	4.64955	Estimated by mean values
		KO	1.94 (↓58.27%)
*, K-S test was used for comparison of cumulative probability. N/A, not applicable. ↓ in KO E/I ratio indicating the percentage of the KO value increases or decreases relative to respective WT value.
Figure 6. Mossy cells provide the main excitatory drive onto hilar interneurons
Figure 6	Genotype	Condition	mean ± SEM	Number of cells tested	p value (within genotype) [Basal vs +DCG-IV (or +WIN)]
Figure 6C Interneurons Normalized count of sEPSCs	WT	Basal	1.00 ± 0.00	6	0.98893
		+ DCG-IV	1.00 ± 0.16	6
		Basal	1.00 ± 0.00	6	0.00039
		+ WIN	0.49 ± 0.06	6
Figure 6F Interneurons Normalized count of sEPSCs	KO	Basal	1.00 ± 0.00	7	0.65232
		+ DCG-IV	1.08 ± 0.16	7
		Basal	1.00 ± 0.00	7	0.00013
		+WIN	0.60 ± 0.05	7
Figure 6I Mossy cells Normalized count of sEPSCs	WT	Basal	1.00 ± 0.00	4	0.0054
		+ DCG-IV	0.48 ± 0.07	4
		Basal	1.00 ± 0.00	4	0.11715
		+ WIN	1.15 ± 0.07	4
WT and KO values were normalized to their respective basal values.
Figure 7. Circuit-wide inhibition of Kv7 channels boosted inhibitory drive onto granule cells and corrected granule cell excitability in Fmr1 KO mice
Figure 7	Condition	Genotype	mean ± SEM	Number of cells tested	p value (WT vs KO)	p value (No XE vs + XE991 within genotype)
Figure 7B sEPSC frequency (Hz)	Basal	WT	0.32 ± 0.09	7	0.76058	see next two rows
		KO	0.29 ± 0.06	7
	+ XE991	WT	0.34 ± 0.05	7	0.66718	WT (No XE vs +XE)	0.71866
		KO	0.3 ± 0.07	7		KO (No XE vs +XE)	0.75626
Figure 7C sIPSC frequency (Hz)	Basal	WT	1.04 ± 0.12	7	0.84378	see next two rows
		KO	1.00 ± 0.18	7
	+ XE991	WT	1.08 ± 0.19	7	0.04061	WT (No XE vs +XE)	0.72324
		KO	1.96 ± 0.34	7		KO (No XE vs +XE)	0.00301
Figure 7D E/I ratio (by frequency)	Basal	WT	0.31 ± 0.07	7	0.907	see next two rows
		KO	0.32 ± 0.06	7
	+ XE991	WT	0.37 ± 0.06	7	0.0059	WT (No XE vs +XE)	0.5335
		KO	0.15 ± 0.02	7		KO (No XE vs +XE)	0.03403
Figure 7	Step current (pA)	Genotype	mean ± SEM	Number of cells tested	p value (WT vs KO)	p value (No XE vs + XE991 within genotype)
Figure 7F (Upper panel) Isolated GCs AP count (Basal)	50	WT	0.60 ± 0.40	5	0.01695	see "+XE991" rows
		KO	3.37 ± 0.83	5
	55	WT	1.23 ± 0.45	5	0.00241	see "+XE991" rows
		KO	5.84 ± 0.96	5
	60	WT	2.15 ± 0.65	5	0.00289	see "+XE991" rows
		KO	7.59 ± 1.11	5
	65	WT	3.56 ± 0.86	5	0.00332	see "+XE991" rows
		KO	9.08 ± 1.03	5
	70	WT	4.43 ± 0.75	5	0.00265	see "+XE991" rows
		KO	10.60 ± 1.23	5
	75	WT	5.75 ± 0.85	5	0.00233	see "+XE991" rows
		KO	12.50 ± 1.28	5
Figure 7F (Lower panel) Isolated GCs AP count (+XE991)	50	WT	3.91 ± 1.68	5	0.04551	WT (No XE vs +XE)	0.0818
		KO	10.21 ± 2.06	5		KO (No XE vs +XE)	0.0334
	55	WT	6.06 ± 2.05	5	0.02198	WT (No XE vs +XE)	0.04124
		KO	13.80 ± 1.80	5		KO (No XE vs +XE)	0.02333
	60	WT	7.47 ± 2.05	5	0.02318	WT (No XE vs +XE)	0.02033
		KO	15.48 ± 1.99	5		KO (No XE vs +XE)	0.03574
	65	WT	8.83 ± 2.29	5	0.01723	WT (No XE vs +XE)	0.02773
		KO	17.66 ± 1.86	5		KO (No XE vs +XE)	0.02322
	70	WT	9.93 ± 2.28	5	0.01204	WT (No XE vs +XE)	0.02826
		KO	19.40 ± 1.84	5		KO (No XE vs +XE)	0.02667
	75	WT	11.38 ± 2.3	5	0.01001	WT (No XE vs +XE)	0.01855
		KO	21.09 ± 1.76	5		KO (No XE vs +XE)	0.03012
Figure 7H (Upper panel) GCs with intact circuit AP count (Basal)	50	WT	0.79 ± 0.48	6	0.05186	see "+XE991" rows
		KO	3.64 ± 1.20	6
	55	WT	1.14 ± 0.58	6	0.02136	see "+XE991" rows
		KO	4.94 ± 1.27	6
	60	WT	2.14 ± 0.78	6	0.02311	see "+XE991" rows
		KO	6.20 ± 1.30	6
	65	WT	3.04 ± 0.84	6	0.03448	see "+XE991" rows
		KO	7.20 ± 1.47	6
	70	WT	4.28 ± 0.79	6	0.03926	see "+XE991" rows
		KO	8.35 ± 1.52	6
	75	WT	5.23 ± 0.73	6	0.05586	see "+XE991" rows
		KO	9.19 ± 1.69	6
Figure 7H (Lower panel) GCs with intact circuit AP count (+XE991)	50	WT	3.90 ± 1.44	6	0.87305	WT (No XE vs +XE)	0.03399
		KO	4.15 ± 0.54	6		KO (No XE vs +XE)	0.91875
	55	WT	5.76 ± 1.91	6	0.93769	WT (No XE vs +XE)	0.00245
		KO	5.60 ± 0.82	6		KO (No XE vs +XE)	0.35997
	60	WT	6.84 ± 2.05	6	0.92921	WT (No XE vs +XE)	0.00665
		KO	7.06 ± 1.20	6		KO (No XE vs +XE)	0.33483
	65	WT	8.27 ± 2.14	6	0.98096	WT (No XE vs +XE)	0.00756
		KO	8.21 ± 1.29	6		KO (No XE vs +XE)	0.24645
	70	WT	9.85 ± 2.19	6	0.85514	WT (No XE vs +XE)	0.00747
		KO	9.36 ± 1.45	6		KO (No XE vs +XE)	0.20944
	75	WT	10.80 ± 2.22	6	0.90817	WT (No XE vs +XE)	0.01147
		KO	10.46 ± 1.81	6		KO (No XE vs +XE)	0.14555
Figure 8. Circuit-wide inhibition of Kv7 channels restored dentate output during theta-gamma coupling stimulation in Fmr1 KO mice
Figure 8	Condition	Genotype	mean ± SEM	Number of cells tested	p value (WT vs KO)	p value (No XE vs + XE991 within genotype)
Figure 8C Excitatory component (norm.)	Basal	WT	0.45 ± 0.07	6	0.18795	see next two rows
		KO	0.58 ± 0.06	7
	+ XE991	WT	0.59 ± 0.06	7	0.40387	WT (No XE vs +XE)	0.1612
		KO	0.53 ± 0.04	8		KO (No XE vs +XE)	0.48863
Figure 8D Inhibitory component (norm.)	Basal	WT	0.12 ± 0.03	6	0.0419	see next two rows
		KO	0.04 ± 0.02	7
	+ XE991	WT	0.11 ± 0.04	7	0.9872	WT (No XE vs +XE)	0.83913
		KO	0.11 ± 0.03	8		KO (No XE vs +XE)	0.0497
Figure 8E Underlying IPSC (norm.)	Basal	WT	0.80 ± 0.03	6	0.00657	see next two rows
		KO	0.62 ± 0.05	7
	+ XE991	WT	0.69 ± 0.04	7	0.09541	WT (No XE vs +XE)	0.06361
		KO	0.81 ± 0.05	8		KO (No XE vs +XE)	0.0123
Figure 8F E/I ratio by peak	Basal	WT	1.27 ± 0.05	6	0.0116	see next two rows
		KO	1.69 ± 0.12	7
	+ XE991	WT	1.64 ± 0.16	7	0.05947	WT (No XE vs +XE)	0.05773
		KO	1.29 ± 0.09	8		KO (No XE vs +XE)	0.03462
Figure 8G E/I ratio by charge	Basal	WT	0.88 ± 0.04	6	0.00294	see next two rows
		KO	1.35 ± 0.11	7
	+ XE991	WT	1.05 ± 0.09	7	0.74566	WT (No XE vs +XE)	0.11358
		KO	1.08 ± 0.05	8		KO (No XE vs +XE)	0.03527
Figure 8H Excitation window (ms)	Basal	WT	8.28 ± 0.69	6	0.0073	see next two rows
		KO	14.03 ± 1.50	7
	+ XE991	WT	9.59 ± 0.67	7	0.64246	WT (No XE vs +XE)	0.2023
		KO	9.05 ± 0.89	8		KO (No XE vs +XE)	0.04411
Figure 8K (Upper panel) granule cell AP probability (Basal)	Control	WT	0.47 ± 0.03	14	0.97893	see "+XE991" rows
		KO	0.47 ± 0.03	12
	1st second	WT	0.09 ± 0.02	14	0.0006	see "+XE991" rows
		KO	0.21 ± 0.03	12
	2nd second	WT	0.28 ± 0.03	14	0.0009	see "+XE991" rows
		KO	0.46 ± 0.04	12
	3rd second	WT	0.36 ± 0.04	14	0.01863	see "+XE991" rows
		KO	0.51 ± 0.04	12
Figure 8K (Lower panel) granule cell AP probability (+XE991)	Control	WT	0.46 ± 0.02	14	0.09764	WT (basal vs XE)	0.82742
		KO	0.39 ± 0.04	10		KO (basal vs XE)	0.11948
	1st second	WT	0.06 ± 0.01	14	0.11847	WT (basal vs XE)	0.2007
		KO	0.10 ± 0.03	10		KO (basal vs XE)	0.01054
	2nd second	WT	0.23 ± 0.02	14	0.25639	WT (basal vs XE)	0.17289
		KO	0.30 ± 0.07	10		KO (basal vs XE)	0.04731
	3rd second	WT	0.34 ± 0.03	14	0.76091	WT (basal vs XE)	0.85391
		KO	0.32 ± 0.06	10		KO (basal vs XE)	0.10776
Figure 3—figure supplement 1. No changes in KCNQ2 and KCNQ3 expression in Fmr1 KO mice
Figure 3—figure supplement 1	Parameter (Western blot)	Genotype	mean ± SEM	Number of mice tested	p value (WT vs KO)
Figure 3—figure supplement 1A	KCNQ2 (whole brain)	WT	0.69 ± 0.10	5	0.75314
		KO	0.64 ± 0.13	5
Figure 3—figure supplement 1A	KCNQ3 (whole brain)	WT	0.18 ± 0.03	5	0.15476
		KO	0.26 ± 0.03	5
Figure 3—figure supplement 1C	KCNQ2 (Dentate gyrus)	WT	0.29 ± 0.03	5	0.75101
		KO	0.28 ± 0.03	5
Figure 3—figure supplement 1D	KCNQ3 (Dentate gyrus)	WT	0.41 ± 0.14	4	0.38937
		KO	0.49 ± 0.10	5
Figure 4—figure supplement 1. Changes in miniature synaptic inputs onto mossy cells in Fmr1 KO mice
Figure 4—figure supplement 1	Parameter	Genotype	mean ± SEM	Number of cells tested	p value (WT vs KO)
Figure 4—figure supplement 1B	Cumulative probability*	WT	N/A	6	0.0046
		KO	N/A	8
	mEPSC count (/min)	WT	709.67 ± 228.51	6	0.03463
		KO	1343.00 ± 154.78	8
Figure 4—figure supplement 1C	mEPSC amplitude (pA)	WT	72.23 ± 10.86	7	0.80984
		KO	75.46 ± 7.98	9
Figure 4—figure supplement 1E	Cumulative probability*	WT	N/A	18	0.1011
		KO	N/A	22
	mIPSC count (/min)	WT	275.89 ± 33.98	18	0.30377
		KO	325.91 ± 33.31	22
Figure 4—figure supplement 1F	mIPSC amplitude (pA)	WT	32.56 ± 2.83	18	0.24776
		KO	37.49 ± 3.01	22
*, K-S test was used for comparison of cumulative probability. N/A, not applicable.
Figure 5—figure supplement 1. Changes in miniature synaptic inputs onto hilar interneurons in Fmr1 KO mice
Figure 5—figure supplement 1A Number and ratio of interneuron types
GenotypeCelltype	Non-adapting cells		Adapting cells	Burst firing cells
WT	21 (54.1%)		4 (10.8%)	12 (35.1%)
KO	17 (62.1%)		3 (10.3%)	9 (27.6%)
Total (cell type)	38 (57.6%)		7 (10.6%)	21 (31.8%)
Total (genotype)	WT 37, KO 29, both genotypes 66
Chi-square test, χ2 (2, 66) = 0.02312398 (less than the critical value of 5.9915 for a = 0.05, indicating no significant difference in the cell-type ratios between WT and KO.)
Chi-squre test, p = 0.9885046.
Figure 5—figure supplement 1	Parameter	Genotype	mean ± SEM	Number of cells tested	p value (WT vs KO)
Figure 5—figure supplement 1B	RMP (mV)	WT	-55.05 ± 0.54	37	0.52945
		KO	-54.45 ± 0.83	29
Figure 5—figure supplement 1C	Capacitance (pF)	WT	27.27 ± 1.15	37	0.68783
		KO	28.15 ± 1.98	29
Figure 5—figure supplement 1D	Input resistance (MW)	WT	425.49 ± 24.05	37	0.79275
		KO	435.27 ± 28.49	29
Figure 5—figure supplement 1E	Threshold (mV)	WT	-39.32 ± 0.52	37	0.40858
		KO	-38.68 ± 0.56	29
Figure 5—figure supplement 1G	Cumulative probability*	WT	N/A	8	<0.00001
		KO	N/A	7
	mEPSC count (/min)	WT	534.25 ± 145.85	8	0.00974
		KO	57.86 ± 16.57	7
Figure 5—figure supplement 1H	mEPSC amplitude (pA)	WT	51.69 ± 4.41	8	0.06326
		KO	38.12 ± 5.06	7
Figure 5—figure supplement 1J	Cumulative probability*	WT	N/A	10	0.0977
		KO	N/A	6
	mIPSC count (/min)	WT	61.10 ± 22.02	10	0.46628
		KO	37.33 ± 17.54	6
Figure 5—figure supplement 1K	mIPSC amplitude (pA)	WT	36.33 ± 3.96	10	0.92243
		KO	35.63 ± 6.28	6
*, K-S test was used for comparison of cumulative probability. N/A, not applicable.
Figure 7—figure supplement 1. Effect of XE991 on spontaneous synaptic inputs onto GCs
Figure 7—figure supplement 1	Condition	Genotype	mean ± SEM	Number of cells tested	p value (WT vs KO)	p value (No XE vs + XE991 within genotype)
Figure 7—figure supplement 1B sEPSC amplitude (pA)	Basal	WT	24.10 ± 2.28	7	0.48259	see next two rows
		KO	21.95 ± 1.90	7
	+ XE991	WT	19.71 ± 1.55	7	0.81642	WT	0.00309
		KO	19.07 ± 2.20	7		KO	0.04308
Figure 7—figure supplement 1C sIPSC amplitude (pA)	Basal	WT	20.27 ± 1.16	7	0.63095	see next two rows
		KO	21.37 ± 1.90	7
	+ XE991	WT	17.77 ± 0.95	7	0.80127	WT	0.01661
		KO	17.30 ± 1.58	7		KO	0.00189
Figure 7—figure supplement 1D E/I ratio (by amplitude)	Basal	WT	1.19 ± 0.08	7	0.08455	see next two rows
		KO	1.03 ± 0.03	7
	+ XE991	WT	1.10 ± 0.04	7	0.94352	WT	0.10015
		KO	1.11 ± 0.08	7		KO	0.35012
Figure 7—figure supplement 1E sEPSC charge transfer (pA·ms)	Basal	WT	82.92 ± 6.45	7	0.18959	see next two rows
		KO	69.11 ± 7.56	7
	+ XE991	WT	83.23 ± 5.73	7	0.37118	WT	0.93365
		KO	70.78 ± 12.11	7		KO	0.82689
Figure 7—figure supplement 1F sIPSC charge transfer (pA·ms)	Basal	WT	73.39 ± 3.98	7	0.51672	see next two rows
		KO	79.34 ± 7.96	7
	+ XE991	WT	82.31 ± 4.63	7	0.30529	WT	0.08746
		KO	72.66 ± 7.74	7		KO	0.30306
Figure 7—figure supplement 1G E/I ratio (by charge transfer)	Basal	WT	1.13 ± 0.05	7	0.15131	see next two rows
		KO	0.98 ± 0.08	7
	+ XE991	WT	1.01 ± 0.03	7	0.57451	WT	0.06407
		KO	0.95 ± 0.09	7		KO	0.88906
Figure 7—figure supplement 2. Estimation of direct and circuit effects of XE991 on granule cell excitability
Figure 7—figure supplement 2	Step current (pA)	Genotype	Values estimated from mean
Figure 7—figure supplement 2A XE991 action within granule cells (number of APs)	50	WT	3.31
		KO	6.84
	55	WT	4.83
		KO	7.96
	60	WT	5.32
		KO	7.89
	65	WT	5.27
		KO	8.58
	70	WT	5.5
		KO	8.8
	75	WT	5.63
		KO	8.59
Figure 7—figure supplement 2B XE991 action from dentate circuit (number of APs)	50	WT	0.03
		KO	-6.68
	55	WT	0.38
		KO	-6.25
	60	WT	0.81
		KO	-5.96
	65	WT	1.17
		KO	-5.99
	70	WT	-0.1
		KO	-5.76
	75	WT	0.13
		KO	-4.9
Figure 8—figure supplement 2. Circuit-wide inhibition of Kv7 channels enhanced the gamma burst-induced suppression of EPSP integration in Fmr1 KO mice
Figure 8—figure supplement 2	Parameter	Genotype	mean ± SEM	Number of cells tested	p value (WT vs KO)	p value (Basal vs +XE991 within genotype)
Figure 8—figure supplement 2B	EPSP (mV) (No XE991)	WT	22.65 ± 1.10	14	0.16073	see next tow rows
		KO	20.66 ± 0.73	12
Figure 8—figure supplement 2D	EPSP (mV) (+ XE991)	WT	20.89 ± 0.57	14	0.32137	WT (No XE vs +XE)	0.16896
		KO	20.04 ± 0.57	10		KO (No XE vs +XE)	0.52682
Figure 8—figure supplement 2	Stimulus #	Genotype	mean ± SEM	Number of cells tested	p value (WT vs KO)
Figure 8—figure supplement 2B (Left panel) EPSP normalized amplitude (control stimulus) (No XE991)	1	WT	1.04 ± 0.01	14	0.59725
		KO	1.03 ± 0.01	12
	2	WT	1.01 ± 0.02	14	0.51456
		KO	1.03 ± 0.02	12
	3	WT	1.01 ± 0.02	14	0.98511
		KO	1.01 ± 0.01	12
	4	WT	1.03 ± 0.02	14	0.46543
		KO	1.04 ± 0.02	12
	5	WT	1.01 ± 0.01	14	0.71914
		KO	1.01 ± 0.02	12
	6	WT	1.00 ± 0.01	14	0.21751
		KO	1.04 ± 0.03	12
	7	WT	1.00 ± 0.01	14	0.45138
		KO	1.01 ± 0.02	12
	8	WT	1.00 ± 0.02	14	0.49648
		KO	0.98 ± 0.02	12
	9	WT	1.00 ± 0.02	14	0.13733
		KO	0.96 ± 0.02	12
	10	WT	1.00 ± 0.01	14	0.52223
		KO	0.99 ± 0.02	12
	11	WT	0.99 ± 0.01	14	0.97942
		KO	0.99 ± 0.02	12
	12	WT	0.98 ± 0.01	14	0.8063
		KO	0.97 ± 0.01	12
	13	WT	1.00 ± 0.01	14	0.94782
		KO	1.00 ± 0.02	12
	14	WT	0.98 ± 0.01	14	0.68896
		KO	0.97 ± 0.01	12
	15	WT	1.00 ± 0.01	14	0.29475
		KO	0.99 ± 0.01	12
Figure 8—figure supplement 2B (Right panel) EPSP normalized amplitude (Test stimulus) (NO XE991)	1	WT	0.46 ± 0.03	14	<0.00001
		KO	0.74 ± 0.04	12
	2	WT	0.64 ± 0.02	14	<0.00001
		KO	0.89 ± 0.04	12
	3	WT	0.74 ± 0.02	14	<0.00001
		KO	0.98 ± 0.04	12
	4	WT	0.78 ± 0.02	14	2e-05
		KO	1.01 ± 0.04	12
	5	WT	0.76 ± 0.02	14	3e-05
		KO	1.01 ± 0.05	12
	6	WT	0.80 ± 0.02	14	3e-05
		KO	1.02 ± 0.04	12
	7	WT	0.80 ± 0.02	14	5e-05
		KO	1.01 ± 0.04	12
	8	WT	0.79 ± 0.03	14	0.00013
		KO	1.01 ± 0.04	12
	9	WT	0.81 ± 0.02	14	<0.00001
		KO	1.03 ± 0.04	12
	10	WT	0.80 ± 0.02	14	5e-05
		KO	1.03 ± 0.04	12
	11	WT	0.81 ± 0.02	14	0.0001
		KO	1.02 ± 0.04	12
	12	WT	0.83 ± 0.02	14	2e-05
		KO	1.05 ± 0.04	12
	13	WT	0.80 ± 0.02	14	0.00115
		KO	0.98 ± 0.05	12
	14	WT	0.80 ± 0.03	14	0.00019
		KO	1.02 ± 0.04	12
	15	WT	0.81 ± 0.03	14	0.0001
		KO	1.02 ± 0.04	12
Figure 8—figure supplement 2D (Left panel) EPSP normalized amplitude (control stimulus) (+ XE991)	1	WT	1.03 ± 0.01	14	0.0702
		KO	0.99 ± 0.01	10
	2	WT	1.00 ± 0.02	14	0.55476
		KO	0.98 ± 0.02	10
	3	WT	1.01 ± 0.02	14	0.98112
		KO	1.01 ± 0.01	10
	4	WT	1.02 ± 0.01	14	0.71698
		KO	1.01 ± 0.02	10
	5	WT	1.01 ± 0.02	14	0.13496
		KO	0.98 ± 0.01	10
	6	WT	0.97 ± 0.02	14	0.17428
		KO	1.00 ± 0.02	10
	7	WT	1.00 ± 0.01	14	0.09702
		KO	1.02 ± 0.01	10
	8	WT	1.00 ± 0.01	14	0.63306
		KO	1.01 ± 0.02	10
	9	WT	1.01 ± 0.02	14	0.67985
		KO	1.02 ± 0.01	10
	10	WT	1.00 ± 0.01	14	0.80769
		KO	1.00 ± 0.02	10
	11	WT	1.00 ± 0.01	14	0.93354
		KO	1.00 ± 0.02	10
	12	WT	1.00 ± 0.01	14	0.64994
		KO	0.99 ± 0.03	10
	13	WT	0.97 ± 0.02	14	0.31199
		KO	0.99 ± 0.02	10
	14	WT	0.99 ± 0.01	14	0.96013
		KO	0.99 ± 0.02	10
	15	WT	0.99 ± 0.01	14	0.15667
		KO	1.01 ± 0.01	10
Figure 8—figure supplement 2D (Right panel) EPSP normalized amplitude (Test stimulus) (+ XE991)	1	WT	0.71 ± 0.03	14	0.08684
		KO	0.62 ± 0.04	10
	2	WT	0.77 ± 0.03	14	0.02263
		KO	0.66 ± 0.03	10
	3	WT	0.82 ± 0.04	14	0.06573
		KO	0.72 ± 0.03	10
	4	WT	0.86 ± 0.04	14	0.10039
		KO	0.76 ± 0.04	10
	5	WT	0.87 ± 0.03	14	0.15131
		KO	0.79 ± 0.04	10
	6	WT	0.87 ± 0.03	14	0.10975
		KO	0.78 ± 0.05	10
	7	WT	0.89 ± 0.04	14	0.10782
		KO	0.80 ± 0.04	10
	8	WT	0.89 ± 0.03	14	0.05007
		KO	0.79 ± 0.03	10
	9	WT	0.86 ± 0.04	14	0.22119
		KO	0.79 ± 0.04	10
	10	WT	0.91 ± 0.04	14	0.08052
		KO	0.80 ± 0.05	10
	11	WT	0.89 ± 0.04	14	0.29036
		KO	0.83 ± 0.04	10
	12	WT	0.90 ± 0.04	14	0.30202
		KO	0.83 ± 0.05	10
	13	WT	0.90 ± 0.04	14	0.29607
		KO	0.84 ± 0.04	10
	14	WT	0.92 ± 0.03	14	0.12978
		KO	0.84 ± 0.03	10
	15	WT	0.91 ± 0.04	14	0.2687
		KO	0.85 ± 0.03	10
